# Supplementary material for: Dispensing and practice use patterns, facilitators and barriers for uptake of ulipristal acetate emergency contraception in British Columbia: a mixed-methods study
Source: PubMed Central journal article supplement — CMAJ Open. 2021 Nov 30;9(4):E1097–104. doi: 10.9778/cmajo.20200193 (PMC8648349; doi:10.9778/cmajo.20200193), 2021-11-30
Supplement: 2020-0193_original_submission.pdf [file 2020-0193_original_submission.pdf]

|                                                |                                                                                                                                                                           |
|------------------------------------------------|---------------------------------------------------------------------------------------------------------------------------------------------------------------------------|
|                                                | and manuscript writing, with a focus on qualitative methodology and analysis.                                                                                             |
| Dr. Laura Schummers, ScD                       | Quantitative methodology and analysis, administrative health data for research, revisions on study protocol and manuscript                                                |
| Dr. Arianne Albert, PhD                        | Quantitative methodology and analysis                                                                                                                                     |
| Frannie Mackenzie, BA                          | Recruitment, data collection, data management                                                                                                                             |
| Dr. Judith Soon, RPh, PhD                      | Design, ongoing mentoring, data acquisition, interpretation of data, and manuscript review.                                                                               |
| Parkash Ragsdale, BSc (Bioc), BSc (Pharm), RPh | Design, manuscript review                                                                                                                                                 |
| Brian Fitzsimmons, MD                          | Mentoring throughout the study from conception and design to manuscript review                                                                                            |
| Regina Renner, MD, MPH                         | Mentoring throughout the study and manuscript writing from conception, design, data collection, data analysis, interpretation of data for the work and manuscript writing |

### **Current Dispensing and Practice Use Patterns of Ulipristal Acetate (UPA) 30mg (Ella®), as Emergency Contraception in British Columbia, Canada**

#### **Authors: - name, degree (no fellowships) and up to two affiliations for each author**

Dr. Michelle C. Chan, MD, MHSc. – University of British Columbia Department of Obstetrics and Gynecology

Dr. Sarah Munro, PhD - University of British Columbia Department of Obstetrics and Gynecology, Centre for Health Evaluation and Outcome Sciences

Dr. Laura Schummers, ScD - University of British Columbia Department of Family Practice

Dr. Arianne Albert, PhD - Women's Health Research Institute, British Columbia Women's Hospital

Frannie Mackenzie, BA - Women's Health Research Institute, British Columbia Women's Hospital

Dr. Judith Soon, RPh, PhD - University of British Columbia Faculty of Pharmaceutical Sciences; University of British Columbia Department of Family Practice

Parkash Ragsdale, BSc (Bioc), BSc (Pharm), RPh - University of British Columbia Faculty of Pharmaceutical Sciences

Dr. Brian Fitzsimmons, MD - University of British Columbia Department of Obstetrics and Gynecology

Dr. Regina Renner, MD MPH - University of British Columbia Department of Obstetrics and Gynecology

Corresponding author's email address: [michelle.c.chan@gmail.com](mailto:michelle.c.chan@gmail.com)

Funding statement: This study was funded by the Society of Family Planning Research Fund (SFPRF 19-03). LS was supported by a Trainee award from the Michael Smith Foundation for Health Research (17934) and a Postdoctoral Health System Impact Fellowship jointly funded by the Canadian Institutes for Health Research (H17-160383) and British Columbia Ministry of Health (1818). SM was supported by a Michael Smith Foundation for Health Research Scholar Award (18270).

Declarations: The authors have no competing interests to declare.

**Abstract:**

**Background:** Ulipristal acetate 30 mg (UPA) became available as prescription-only emergency contraception in British Columbia, Canada September 2015, in addition to over-the-counter levonorgestrel emergency contraception. In this study, we determined dispensing patterns of UPA and facilitators and barriers for physicians, pharmacists, and patients to emergency contraception use in British Columbia.

**Methods:** The quantitative component of this mixed methods study determined UPA use between 09/2015 and 12/2018 in a database that captures all outpatient prescription dispensations in BC (PharmaNet) and market sales numbers for all emergency contraception in BC (IVQIA). We conducted semi-structured interviews exploring barriers and facilitators affecting UPA use from the perspectives of patients, community pharmacists, and prescribers. We performed iterative data collection and thematic analysis guided by Michie's Theoretical Domains Framework.

**Results:** Over the 3-year period 318 patients filled 368 UPA prescriptions. UPA use increased between 2015-2018. However, levonorgestrel use by sales (range: 118,897-129,478 units/year), was substantially higher than UPA (range: 128-389 units/year).

Analysis of 39 interviews resulted in the following themes and respective theoretical domain: (1) low awareness surrounding UPA (Knowledge) (2) beliefs about and experiences of shame and stigma were barriers to access (Beliefs about Consequences), and (3) multiple health system barriers exist to access emergency contraception (Reinforcement).

**Interpretation:** While there has been increase use of UPA, we identified multiple barriers to access. Opportunities for knowledge translation to improve use and access to emergency contraception and UPA in particular, include: curricular augmentation to address shame and stigma, advocating health policy for cost-free, prescription-free, and solely 'over the counter' emergency contraception.

## Introduction

Ulipristal acetate 30 mg (UPA) became available as prescription-only emergency contraception in Canada September 2015. Emergency contraception prevents pregnancy by delaying ovulation after intercourse without contraception or contraceptive failure (1,2). UPA is superior to levonorgestrel emergency contraception in preventing pregnancy (3). UPA is more effective in overweight people and those 72 hours or more from intercourse (4,5). Accordingly, current Canadian practice guidelines recommend UPA for emergency contraception in people with BMI >25 kg/m<sup>2</sup> (e.g.) 45% of reproductive aged (18-34 years) females in Canada (5,6). There are currently no studies of UPA utilization in Canada.

Canadian research on emergency contraception has explored patient access barriers to levonorgestrel and counselling initiatives (7–11). In other countries, UPA is used less frequently than levonorgestrel; barriers include: limited awareness and misinformation surrounding emergency contraception and limited pharmacy capacity to immediately fill a UPA prescription due to geographic-specific policy regulations or no stock (12–26).

This study demonstrates dispensing patterns of UPA and levonorgestrel emergency contraception and explored facilitators and barriers to use with prescribers, pharmacists, and patients in British Columbia since 2015.

## Methods

This mixed-methods study was conducted with concurrent quantitative and qualitative approaches (27). This study received ethical approval from the University of British Columbia Children's and Women's Research Ethics Board (H18-03350).

Quantitative: We measured emergency contraception use by combining prescription dispensations and pharmaceutical sales 09/2015-12/2018. We identified UPA prescriptions using PharmaNet, a population-based database capturing all outpatient prescriptions dispensed in British Columbia, along with provider practice type. We obtained the volume of emergency contraception units sold to pharmacies from IVQIA, a market research firm. We calculated the number of prescriptions dispensed and sold to pharmacies per year for UPA and levonorgestrel sold separately. We calculated patient participant median age and the proportion of prescriber practice type and speciality for all dispensed UPA prescriptions. We conducted all quantitative analyses using R v3.5.3.

Qualitative: We recruited a purposeful sample of urban and rural participants for one-on-one semi-structured interviews about knowledge, beliefs, and experiences with emergency contraception. We defined urban regions by Statistics Canada census metropolitan areas all other regions as rural (28). Patient eligibility criteria included age ≥18 years, at risk for pregnancy, and English communication. Inclusion criteria for health care included prescribers (physicians and nurse practitioners), community pharmacists, and nurses caring for people at risk for pregnancy. In order to explore potential barriers, we included nurses certified in contraceptive care who can provide contraception but cannot prescribe.

We recruited province-wide using gender, sexuality, and person-first materials (29). We recruited patients by provincial sexual health social media networks, pharmacists by faxing to community pharmacies, and prescribers through provincial practice e-networks. Recruitment materials linked to a REDCap intake survey confirming potential participants met inclusion criteria. We collected demographic data on each patient: age, body mass index, previous emergency contraceptive use.

1  
2  
3 Recruitment stopped once purposeful sampling was completed (30–33). Previous reviews note thematic  
4 saturation with purposeful sampling within twelve interviews (34).  
5

6 MCC, a cis-female of colour feminist obstetrician/gynecologist, conducted all interviews and obtained  
7 verbal consent to participate in the study. We recorded interviews on a secure virtual conferencing  
8 platform. Participants received a \$50 gift card to acknowledge their contribution to the study.  
9

10 We drew from Michie’s Theoretical Domains Framework to develop an interview guide for patients and  
11 prescribers/pharmacists to explore constructs of behaviour change theories (30,33). A professional  
12 transcription service transcribed all audio recordings. Transcripts were cleaned to ensure de-  
13 identification and checked for quality/accuracy (MCC, FM). MCC led a hybrid inductive-deductive  
14 thematic analysis informed by a critical feminist reproductive justice lens (35,36). The primary author  
15 read and re-read the transcripts to gain familiarity with the data. MCC and SM generated a preliminary  
16 inductive codebook, and then deductively matched the codes to the Theoretical Domains. MCC coded  
17 three transcripts to test the preliminary codebook for fit and relevance and reviewed the coding with  
18 SM. They made minor revisions to the codebook for conceptual fit. MCC then coded all transcripts with  
19 the assistance of NVivo 12 Pro. Throughout we engaged in verification strategies including bracketing  
20 exercises, maintaining audit trail and field notes, and frequent team discussions of analysis in progress.  
21  
22  
23

## 24 Results

25  
26 Over the 3-year period 318 patients filled 368 UPA prescriptions: 281 filled one prescription, 26 filled  
27 two prescriptions, and 11 filled 3 or more. The mean age of UPA users was 29.8 years (SD = 7.7) 25%  
28 were younger than 24 while 25% were older than 35. Prescribers included 354 physicians (18 (5%) were  
29 OB/GYN specialists) and 9 nurse practitioners. UPA medication dispensed to patients and purchased by  
30 pharmacies increased (Table 1). Levonorgestrel use by sales (range: 118,897-129,478 units/year), was  
31 substantially higher than UPA (range: 128-389 units/year).  
32  
33

34 We interviewed 12 patients, 12 prescribers, 12 pharmacists, and 3 nurses. Patient median age was 27  
35 years and half had a BMI over 25kg/m<sup>2</sup>. All pharmacists and prescribers reported experience with  
36 levonorgestrel, but only a third with UPA. The qualitative analysis identified more barriers than  
37 facilitators to emergency contraception use. However, because there was such low awareness of UPA,  
38 we could not compare barriers and facilitators to UPA and levonorgestrel separately.  
39  
40

41 We identified 3 core themes mapped to the Theoretical Domains Framework of: knowledge, beliefs  
42 about consequences, reinforcement.  
43

### 44 *1. There was low awareness surrounding UPA (Knowledge).*

45  
46 The knowledge domain defines as awareness of the existence of something. The absence of awareness  
47 led to low knowledge resulting in barriers to UPA. Patients were aware of levonorgestrel availability at a  
48 pharmacy. However, many were unaware of UPA or the need for a prescription. Patients were aware  
49 emergency contraception use to prevent pregnancy after intercourse. Patients demonstrated limited  
50 understanding of how emergency contraception works, and some feared it would be harmful or  
51 dangerous, as explained:  
52  
53

54 *“My understanding is if you were to have unprotected sex or. . . reason why you would think that you*  
55 *might get pregnant, the next day you would take the pill. I understand that it hurts your body a little bit.*  
56  
57  
58  
59  
60

1  
2  
3 You get quite sick. . . And, yeah, that nobody really wants to take it because it kind of makes you a little  
4 bit sick” (R63, patient)  
5

6 When asked about awareness and knowledge of emergency contraception, patients perceived a dearth  
7 of comprehensive sexual education contributing to low reproductive health literacy:  
8

9 *“I think everybody should have sex education and I know not everybody in B.C. has access to . . . sexual  
10 education. . . But I think that any time somebody’s talking about contraceptives or sex or sexual health or  
11 sexuality to youth in schools, I think there needs to be a conversation that’s age appropriate, when they  
12 start talking about contraception to be talking about emergency contraception as well.” (R17, patient)*  
13  
14

15 Prescribers and pharmacists acquired knowledge on emergency contraception in didactic training or  
16 exposure in practice. In practice, prescribers perceived continuing professional development as self-  
17 directed. They reported challenges to know what is newly available, such as UPA, unless spurred by a  
18 clinical encounter.  
19

20 *“Just the need to know about what’s up to date and particularly like I said, because I don’t recall recently  
21 having anybody come in and actually asking me for it.” (R40, prescriber)*  
22

23 Prescribers referenced clinical practice guidelines by the Society of Obstetricians and Gynecologists of  
24 Canada (SOGC) as the standard of care. However, they described barriers to knowledge acquisition, such  
25 as gated access to the SOGC’s resources and guidance.  
26

27 *“I mean, a lot of societies are like that. . . previously we could read the whole guideline and then we were  
28 limited to just reading the highlights and then recently we were just not allowed.” (R56, prescriber)*  
29  
30

## 31 2. Beliefs about or experience of shame and stigma (Beliefs about Consequences)

32 Our analysis of interviews indicated shame and stigma were barriers to access. This mapped to the  
33 theoretical domain of beliefs about consequences, defined as the acceptance of the truth, reality, or  
34 validity about an ability, talent, or facility that a person can put to constructive use.  
35  
36

37 Patients shared beliefs and feelings of shame surrounding potential reasons for needing and when  
38 accessing emergency contraception, for example:  
39

40 *“Because I really feel that there’s a sense of you only take this if you really screwed up this time” (R30,  
41 patient)*  
42

43 *“I think when it comes to having something that somebody would need an emergency contraceptive for  
44 it can be even more shaming. Like why didn’t you use this. Why didn’t you use that. How come you’re not  
45 using the pill. How come you’re not using a condom.” (R17, patient)*  
46  
47

48 *“I think it’s a problem people encounter while getting it. So the outcome of having the medication is still  
49 the same. But people feel bad about it after because of attitudes that they met from . . . filling the  
50 prescription.” (R23, patient)*  
51

52 Prescribers and pharmacists shared opinions on acceptable emergency contraception use. The following  
53 examples illustrated beliefs:  
54  
55  
56  
57  
58  
59  
60

1  
2  
3  
4  
5  
6  
7  
8  
9  
10  
11  
12  
13  
14  
15  
16  
17  
18  
19  
20  
21  
22  
23  
24  
25  
26  
27  
28  
29  
30  
31  
32  
33  
34  
35  
36  
37  
38  
39  
40  
41  
42  
43  
44  
45  
46  
47  
48  
49  
50  
51  
52  
53  
54  
55  
56  
57  
58  
59  
60

*“First of all if you’re sexually active it [EC] shouldn’t be your main source of contraception. But obviously accidents do happen, and when those happen, then that should be an option for you and I will be willing to provide you that care.” (R51, pharmacist)*

*“I think that it should be sort of a last-ditch thing. . . it shouldn’t be used all the time. . . I mean, normally I’m totally happy to dispense it. I don’t want there to be unwanted pregnancies, unwanted abortions, unwanted children. But I sometimes feel like there should be a little bit more preparation done.” (R52, pharmacist)*

Patient participants expressed feelings of shame for needing emergency contraception. Patient lived experience and health care provider beliefs on acceptable emergency contraceptive use can contribute to reinforcing perceived shame beliefs by patients.

### 3. Health care system barriers (Reinforcement)

We identified multiple health system barriers for patients seeking emergency contraception, including prescription, ‘behind the counter’ access, limited supply due to perceptions of low demand, and cost. These barriers mapped to the theoretical domain of reinforcement: encouraging a behaviour through positive or negative stimulus.

Patients identified prescription status for UPA a barrier: needing to take time away from work, finding transportation or waiting unpredictable walk-in clinic hours.

*“If I had two options, one was a prescribed pill and one was an over the counter pill, I would go for the over the counter pill. Because I don’t want to book an appointment with my doctor to go get the prescription, to then go to the pharmacy to pick up the medication. I just want to go directly to the pharmacy and get the pill.” (R19, patient)*

We identified ‘counter status’: where emergency contraception is physically located a barrier. Although levonorgestrel is “over the counter” pharmacists often keep it “behind the counter” to reinforce medication safety and patient counselling. From the patient’s perspective, this practice inadvertently reinforced access barriers and did not consider patient-identified characteristics of ‘safety’: privacy, mental wellness, avoiding shame or stigma. As one pharmacist described:

*“[We place it] behind the counter, so we want to make sure we don’t miss anything. So even if someone come to the counter request emergency contraception, the pharmacist will automatically provide counselling to the patient. . . We dispense medication. And we have to provide counselling of everything that leaves the drugstore. Every kind of medication we provide counselling. And the counselling is done by the pharmacist.” (R111, pharmacist)*

Pharmacist duty to counsel was in tension with patients’ reported desire for privacy and minimal contact to mitigate shame and stigma:

*“Someone might be really embarrassed to be in the pharmacy. . . I know it’s my experience of feeling embarrassed to be inside the pharmacy and want to get out as quickly as possible. Don’t want to look at the pharmacist. You just want to get your pill and leave.” (R16, patient)*

Many pharmacists reported that their pharmacies did not regularly stock UPA because of perceived low demand and concerns about the costs of expired product to their business:

1  
2  
3  
4  
5  
6  
7  
8  
9  
10  
11  
12  
13  
14  
15  
16  
17  
18  
19  
20  
21  
22  
23  
24  
25  
26  
27  
28  
29  
30  
31  
32  
33  
34  
35  
36  
37  
38  
39  
40  
41  
42  
43  
44  
45  
46  
47  
48  
49  
50  
51  
52  
53  
54  
55  
56  
57  
58  
59  
60

*“But for sure if the government allows ulipristal to be also prescribed by pharmacists then I think in general pharmacy is—it’s a business. So they would do whatever that would make them money. So if they think that increasing the awareness of this new birth control pill that’s effective for five days after rather than three days after, and more girls are aware of it and they kept—more girls are asking for it, then they would see it as a business opportunity. Then that would be what would make them, like, advertise or—to advocate for the change.” (R31, pharmacist)*

All participants cited cost as a barrier to emergency contraceptive access, patient emphasized:

*“I think cost being the big one” (R17, patient).*

Taken together, diverse health system barriers impacted access to emergency contraception and patients’ help-seeking behaviours. Although UPA may be a superior option for preventing pregnancy, multiple barriers exist to access relative to over-the-counter levonorgestrel.

### Interpretation

Since availability of UPA emergency contraception, there has been an increase in the number of units sold and dispensed, compared to stable levonorgestrel sales. Despite current guidance from the Society of Obstetrics and Gynecology, levonorgestrel continues to be sold more frequently than UPA.

All participants identified low awareness of UPA, consistent with previous studies (19,21). Australian and European studies similarly found that UPA was not frequently supplied or sold due to lack of clinical knowledge and new market status (14,26). Our findings suggest a need to increase awareness and knowledge to optimize clinically recommended UPA use.

Shame and stigma are determinants of health outcomes and health inequities, particularly in reproductive health. People who experience stigma have poorer health outcomes because of adjusted help-seeking behaviour (37). Our analysis illustrates patient experienced stigma and shame in accessing emergency contraception: a patient avoids pharmacy counselling with subsequent mistimed emergency contraception use. Patient experiences may have been in reaction to health care perception of emergency contraception as a last resort for preventing pregnancy and emergency contraception use only if they *“really screwed up.”* To facilitate implementation of UPA in routine contraceptive care, it is critical to address beliefs about shame and stigma.

We identified multiple barriers in patient access to emergency contraception consistent with previous secret shoppers studies observing similar difficulties (16–18). Our results offer a refined understanding of ‘counter status’ barrier – the desire to avoid shaming and limit social contact were salient to patients while pharmacists held concerns about their duty to provide safe medication counselling. The cost of medication is a known barrier, prior research found people from affluent areas were significantly more likely to use emergency contraception to prevent pregnancy than individuals from less affluent areas (38). Our results further identified that pharmacists were concerned about the cost to their business of expired stock in the event of low consumer demand.

Study strengths included population-based prescription dispensation data and diverse research advisory team included diverse expertise. Limitations included no guarantee people take medications dispensed and no provincial BMI data.

**Conclusion:** We found increased UPA and stable levonorgestrel use from 2015-2018. We identified multiple barriers to access: low awareness of UPA, perceived and experienced shame and stigma, and health systems barriers reinforcing challenges to access emergency contraception. There is potential to optimize recommended clinical practice with comprehensive sexual education and health care curricular augmentation addressing stigma to normalize emergency contraception access. At a health system level, it is critical to move towards cost-free, prescription-free and solely 'over the counter' emergency contraception to improve patient-centred access and evidence-based care.

**Acknowledgments:** We gratefully acknowledge the research and resource support from Nicole Prestley with the Women's Health Research Institute.

## Tables & Figures

Table 1 – PharmaNet dispensation and IVQIA sales 2015-2018 in British Columbia

| Year  | PharmaNet Data |         | IVQIA Data |  |
|-------|----------------|---------|------------|--|
|       | UPA Dispensed  | LNG     | UPA        |  |
| 2015* | <5             | 56 021  | 44         |  |
| 2016  | 48             | 129 478 | 128        |  |
| 2017  | 149            | 118 897 | 195        |  |
| 2018  | 167            | 124 910 | 389        |  |

\*2015 only includes Sept-Dec rather than the full year

## References:

- Trussell J, Raymond EG, Cleland K. Emergency Contraception: A Last Chance to Prevent Unintended Pregnancy. *Contemp Readings Law Soc Justice* [Internet]. 2014 [cited 2020 Apr 22];6. Available from: <https://heinonline.org/HOL/Page?handle=hein.journals/conreadlsj6&id=813&div=100&collection=journals>
- Sabourin JN, Burnett M. A Review of Therapeutic Abortions and Related Areas of Concern in Canada. Vol. 34, *Journal of Obstetrics and Gynaecology Canada*. 2012.
- Shen J, Che Y, Showell E, Chen K, Cheng L. Interventions for emergency contraception. Vol. 2019, *Cochrane Database of Systematic Reviews*. John Wiley and Sons Ltd; 2019.
- Glasier AF, Cameron ST, Fine PM, Logan SJ, Casale W, Van Horn J, et al. Ulipristal acetate versus levonorgestrel for emergency contraception: a randomised non-inferiority trial and meta-analysis. *Lancet*. 2010 Feb 13;375(9714):555–62.
- Chapter 3 Emergency Contraception. *J Obstet Gynaecol Can*. 2015 Oct 1;37(10):S20–8.
- Body mass index, overweight or obese, self-reported, adult, age groups (18 years and older) [Internet]. [cited 2020 Apr 22]. Available from: <https://www150.statcan.gc.ca/t1/tbl1/en/tv.action?pid=1310009620>
- Wong K, Hum S, McCarthy L, Dunn S. Beyond Plan B: A Qualitative Study of Canadian Pharmacists' Emergency Contraception Counselling Practices. *J Obstet Gynaecol Canada*. 2017 Nov 1;39(11):1021–7.



- 1  
2  
3 8. Leung VWY, Soon JA, Lynd LD, Marra CA, Levine M. Population-based evaluation of the  
4 effectiveness of two regimens for emergency contraception. *Int J Gynecol Obstet* [Internet]. 2016  
5 Jun 1 [cited 2020 Apr 22];133(3):342–6. Available from:  
6 <http://doi.wiley.com/10.1016/j.ijgo.2015.10.017>  
7
- 8 9. Shoveller J, Chabot C, Soon JA, Levine M. Identifying Barriers to Emergency Contraception Use  
9 among Young Women from Various Sociocultural Groups in British Columbia, Canada. *Perspect*  
10 *Sex Reprod Health* [Internet]. 2007 Apr 22;39(1):13–20. Available from:  
11 <http://www.jstor.org/stable/30042922>  
12
- 13 10. Soon JA, Levine M, Ensom MHH, Gardner JS, Edmondson HM, Fielding DW. The developing role  
14 of pharmacists in patient access to emergency contraception. Vol. 10, *Disease Management and*  
15 *Health Outcomes*. Adis International Ltd; 2002. p. 601–11.  
16
- 17 11. Soon JA, Levine M, Osmond BL, Ensom MHH, Fielding DW. Effects of making emergency  
18 contraception available without a physician's prescription: A population-based study. *CMAJ*. 2005  
19 Mar 29;172(7):878–83.  
20
- 21 12. Vanya M, Matuz M, Benko R, Viola R, Horvath-Sziklai A, Soos G, et al. Knowledge and opinion of  
22 pharmacists on emergency contraceptive pills in Hungary. *Int J Clin Pharm*. 2017 Jun 1;39(3):594–  
23 600.  
24
- 25 13. Milosavljevic J, Bogavac-Stanojevic N, Krajnovic D, Mitrovic-Jovanovic A. Serbian gynecologists'  
26 and pharmacists' beliefs about emergency contraception. *Women Health* [Internet]. 2017 Apr 21  
27 [cited 2020 Apr 22];57(4):508–19. Available from:  
28 <https://www.tandfonline.com/doi/full/10.1080/03630242.2016.1176099>  
29
- 30 14. Collins JC, Schneider CR, Moles RJ. Emergency contraception supply in Australian pharmacies  
31 after the introduction of ulipristal acetate: a mystery shopping mixed-methods study.  
32 *Contraception*. 2018 Sep 1;98(3):243–6.  
33
- 34 15. Tavares MP, Foster AM. Emergency contraception in a public health emergency: exploring  
35 pharmacy availability in Brazil. *Contraception*. 2016 Aug 1;94(2):109–14.  
36
- 37 16. Bullock H, Steele S, Kurata N, Tschann M, Elia J, Kaneshiro B, et al. Pharmacy access to ulipristal  
38 acetate in Hawaii: Is a prescription enough? *Contraception*. 2016 May 1;93(5):452–4.  
39
- 40 17. Hussainy SY, Stewart K, Pham MP. A mystery caller evaluation of emergency contraception  
41 supply practices in community pharmacies in Victoria, Australia. *Aust J Prim Health*.  
42 2015;21(3):310–6.  
43
- 44 18. Shigesato M, Elia J, Tschann M, Bullock H, Hurwitz E, Wu YY, et al. Pharmacy access to Ulipristal  
45 acetate in major cities throughout the United States. *Contraception*. 2018 Mar 1;97(3):264–9.  
46
- 47 19. Milosavljevic J, Krajnovic D, Bogavac-Stanojevic N. Predictors of pharmacists' provision of  
48 emergency contraceptive pills. *Health Care Women Int* [Internet]. 2016 Oct 2 [cited 2020 Apr  
49 22];37(10):1170–81. Available from:  
50 <https://www.tandfonline.com/doi/full/10.1080/07399332.2016.1215464>  
51
- 52 20. Kiechle M, Neuenfeldt M. Experience with oral emergency contraception since the OTC switch in  
53 Germany. *Arch Gynecol Obstet*. 2017 Mar 1;295(3):651–60.  
54
- 55 21. Garrett KP, Widman L, Francis DB, Noar SM. Emergency contraception: Sources of information  
56  
57  
58  
59  
60

- 1  
2  
3 and perceptions of access among young adults. *Women Health* [Internet]. 2016 Aug 17 [cited  
4 2020 Apr 22];56(6):668–79. Available from:  
5 <http://www.tandfonline.com/doi/full/10.1080/03630242.2015.1118727>  
6
- 7 22. Dawson A, Tran NT, Westley E, Mangiaterra V, Festin M. Improving access to emergency  
8 contraception pills through strengthening service delivery and demand generation: A systematic  
9 review of current evidence in low and middle-income countries. *PLoS One*. 2014 Oct 6;9(10).  
10
- 11 23. Batur P, Cleland K, McNamara M, Wu J, Pickle S. Emergency contraception: A multispecialty  
12 survey of clinician knowledge and practices. *Contraception*. 2016 Feb 1;93(2):145–52.  
13
- 14 24. Bastianelli C, Rosato E, Farris M, Benagiano G. Emergency contraception: a survey of 1773  
15 women. *Eur J Contracept Reprod Health Care* [Internet]. 2016 Dec [cited 2020 Apr 22];21(6):455–  
16 61. Available from: <http://www.ncbi.nlm.nih.gov/pubmed/27684583>  
17
- 18 25. Krassovics M, Virágh G. Usage patterns and attitudes towards emergency contraception: the  
19 International Emergency Contraception Research Initiative. *Eur J Contracept Reprod Health Care*  
20 [Internet]. 2016 Aug 3 [cited 2020 Apr 22];21(4):310–7. Available from:  
21 <http://www.ncbi.nlm.nih.gov/pubmed/27259660>  
22
- 23 26. Italia S, Brand H. Status of Emergency Contraceptives in Europe One Year after the European  
24 Medicines Agency’s Recommendation to Switch Ulipristal Acetate to Non-Prescription Status.  
25 *Public Health Genomics* [Internet]. 2016 Aug 1 [cited 2020 Apr 22];19(4):203–10. Available from:  
26 <http://www.ncbi.nlm.nih.gov/pubmed/27022731>  
27
- 28 27. Fetters MD, Curry LA, Creswell JW. Achieving integration in mixed methods designs - Principles  
29 and practices. *Health Serv Res*. 2013;48(6 PART2):2134–56.  
30
- 31 28. Census metropolitan area and Census agglomeration [Internet]. [cited 2020 Apr 24]. Available  
32 from: <https://www150.statcan.gc.ca/n1/pub/92-195-x/2011001/geo/cma-rmr/cma-rmr-eng.htm>  
33
- 34 29. Collier R. Person-first language: what it means to be a “person”. *CMAJ*. 2012;184(18):935–6.  
35
- 36 30. Atkins L, Francis J, Islam R, O’Connor D, Patey A, Ivers N, et al. A guide to using the Theoretical  
37 Domains Framework of behaviour change to investigate implementation problems. *Implement*  
38 *Sci*. 2017 Jun 21;12(1):1–18.  
39
- 40 31. Guetterman TC. Descriptions of Sampling Practices Within Five Approaches to Qualitative  
41 Research in Education and the Health Sciences. *Forum Qual Sozialforsch / Forum Qual Soc Res*  
42 [Internet]. 2015;16(2):Art. 25. Available from:  
43 <http://www.csa.com/partners/viewrecord.php?requester=gs&collection=ENV&recid=7182482>  
44
- 45 32. Palinkas LA, Horwitz SM, Green CA, Wisdom JP, Duan N, Hoagwood K. Purposeful Sampling for  
46 Qualitative Data Collection and Analysis in Mixed Method Implementation Research. *Adm Policy*  
47 *Ment Heal Ment Heal Serv Res* [Internet]. 2015;42(5):533–44. Available from:  
48 <http://dx.doi.org/10.1007/s10488-013-0528-y>  
49
- 50 33. Hussainy SY, Ghosh A, Taft A, Mazza D, Black KI, Clifford R, et al. Protocol for ACCESS: A  
51 qualitative study exploring barriers and facilitators to accessing the emergency contraceptive pill  
52 from community pharmacies in Australia. *BMJ Open*. 2015 Dec 1;5(12):e010009.  
53
- 54 34. Guest G, Bunce A, Johnson L. How Many Interviews Are Enough?: An Experiment with Data  
55 Saturation and Variability. *Field methods*. 2006;18(1):59–82.  
56  
57  
58  
59  
60

- 1
- 2
- 3 35. Ross L, Solinger R. Reproductive justice : an introduction. 2017. 351 p.
- 4
- 5 36. Reinharz S, Davidman L. Feminist methods in social research [Internet]. New York: Oxford
- 6 University Press; 1992. Available from:
- 7 <http://ubc.summon.serialssolutions.com/2.0.0/link/0/eLvHCXMwbV1BT8MgFH5x9eLFuKkRNw3J>
- 8 [DtPDDC1DaOLNuOwH7N4A5UUv9VD\\_f4RCY-](http://ubc.summon.serialssolutions.com/2.0.0/link/0/eLvHCXMwbV1BT8MgFH5x9eLFuKkRNw3J)
- 9 [16fLwAAQJ8PN77HgAvXth2dCbUhVUmNxIFQy25FgatrQuda5RKII5cdd5OXHXGoXaTvzPKo30hZjDj](http://ubc.summon.serialssolutions.com/2.0.0/link/0/eLvHCXMwbV1BT8MgFH5x9eLFuKkRNw3J)
- 10 [UmV\\_Sd0ik5TY5aqMpDoeA3GPNAAbCa0\\_G0yvZfzmkoR-E5Ye7Z38FWYhHmMO](http://ubc.summon.serialssolutions.com/2.0.0/link/0/eLvHCXMwbV1BT8MgFH5x9eLFuKkRNw3J)
- 11
- 12 37. Harris LH. Stigma and Abortion Complications in the United States. *Obstet Gynecol* [Internet].
- 13 2012 Dec [cited 2020 Jun 4];120(6):1472–4. Available from:
- 14 <http://content.wkhealth.com/linkback/openurl?sid=WKPTLP:landingpage&an=00006250->
- 15 [201212000-00030](http://content.wkhealth.com/linkback/openurl?sid=WKPTLP:landingpage&an=00006250-)
- 16
- 17 38. Cameron ST, Gordon R, Glasier A. The effect on use of making emergency contraception available
- 18 free of charge. *Contraception*. 2012 Oct 1;86(4):366–9.
- 19
- 20
- 21
- 22
- 23
- 24
- 25
- 26
- 27
- 28
- 29
- 30
- 31
- 32
- 33
- 34
- 35
- 36
- 37
- 38
- 39
- 40
- 41
- 42
- 43
- 44
- 45
- 46
- 47
- 48
- 49
- 50
- 51
- 52
- 53
- 54
- 55
- 56
- 57
- 58
- 59
- 60

Confidential
